# Supplementary material for: MMAPPR: Mutation Mapping Analysis Pipeline for Pooled RNA-seq
Source: HighWire-hosted journal article supplement (doi:10.1101/gr.146936.112), 2013-01-08
Supplement: Supplemental_Figure_Legends.docx [file Supplemental_Figure_Legends.docx]

**Supplemental Figure Legends**

**Supplemental Figure 1: Distribution of read coverage at snps used for mapping analysis.** Histograms of read coverage at each of the snps in the genome. The 10 read cutoff used for inclusion in the calculated datasets is shown by a red vertical line. The mean and median are shown as blue and green vertical lines, respectively. Datasets in each panel are as follows: A) *Nkx2.5*, B) *Tbx1*, C) *zy13* and D) *zy14*. For clarity, histograms were limited to a range from 0-100 reads. The maximum read-depth was approximately 8,000 in all of the datasets.

**Supplemental Figure 2: Log odds ratio.** Genome-wide plot of the log odds ratio for snps found in the *nkx2.5* line were plotted. Vertical grey lines indicate chromosome boundaries.
