# Supplementary material for: MMAPPR: Mutation Mapping Analysis Pipeline for Pooled RNA-seq
Source: HighWire-hosted journal article supplement (doi:10.1101/gr.146936.112), 2013-01-08
Supplement: Table_S1.docx [file Table_S1.docx]

Table S1. RNA sequencing and alignment.

|  | Mutant Pool | | Wild-type Pool | | Average | |
| --- | --- | --- | --- | --- | --- | --- |
| Sample | Total Reads | Aligned Reads | Total Reads | Aligned Reads | Total Reads | Aligned Reads | Total SNPs |
| Nkx2.5 | 47,947,414 | 23,272,560 | 46,678,977 | 25,470,011 | 47,313,195 | 24,371,285 | 63,973 |
| Tbx1 | 48,962,331 | 23,576,437 | 46,177,600 | 27,944,390 | 47,569,965 | 25,760,413 | 102,806 |
| Zy13 | 43,344,568 | 29,870,719 | 48,780,523 | 33,182,018 | 46,062,545 | 31,526,368 | 103,455 |
| Zy14-1 | 43,294,663 | 29,222,092 | 42,144,757 | 29,101,240 | 42,719,710 | 29,161,666 | 88,233 |
| Zy14-2 | 39,474,509 | 30,847,182 | 34,799,059 | 26,620,691 | 37,136,784 | 28,733,936 | 61,502 |
| Zy14-3 | 46,629,256 | 37,508,053 | 48,681,173 | 37,245,216 | 47,655,214 | 37,376,634 | 66,360 |
