# Supplementary figures and images for: MMAPPR: Mutation Mapping Analysis Pipeline for Pooled RNA-seq
Source: HighWire-hosted journal article supplement (doi:10.1101/gr.146936.112), 2013-01-08

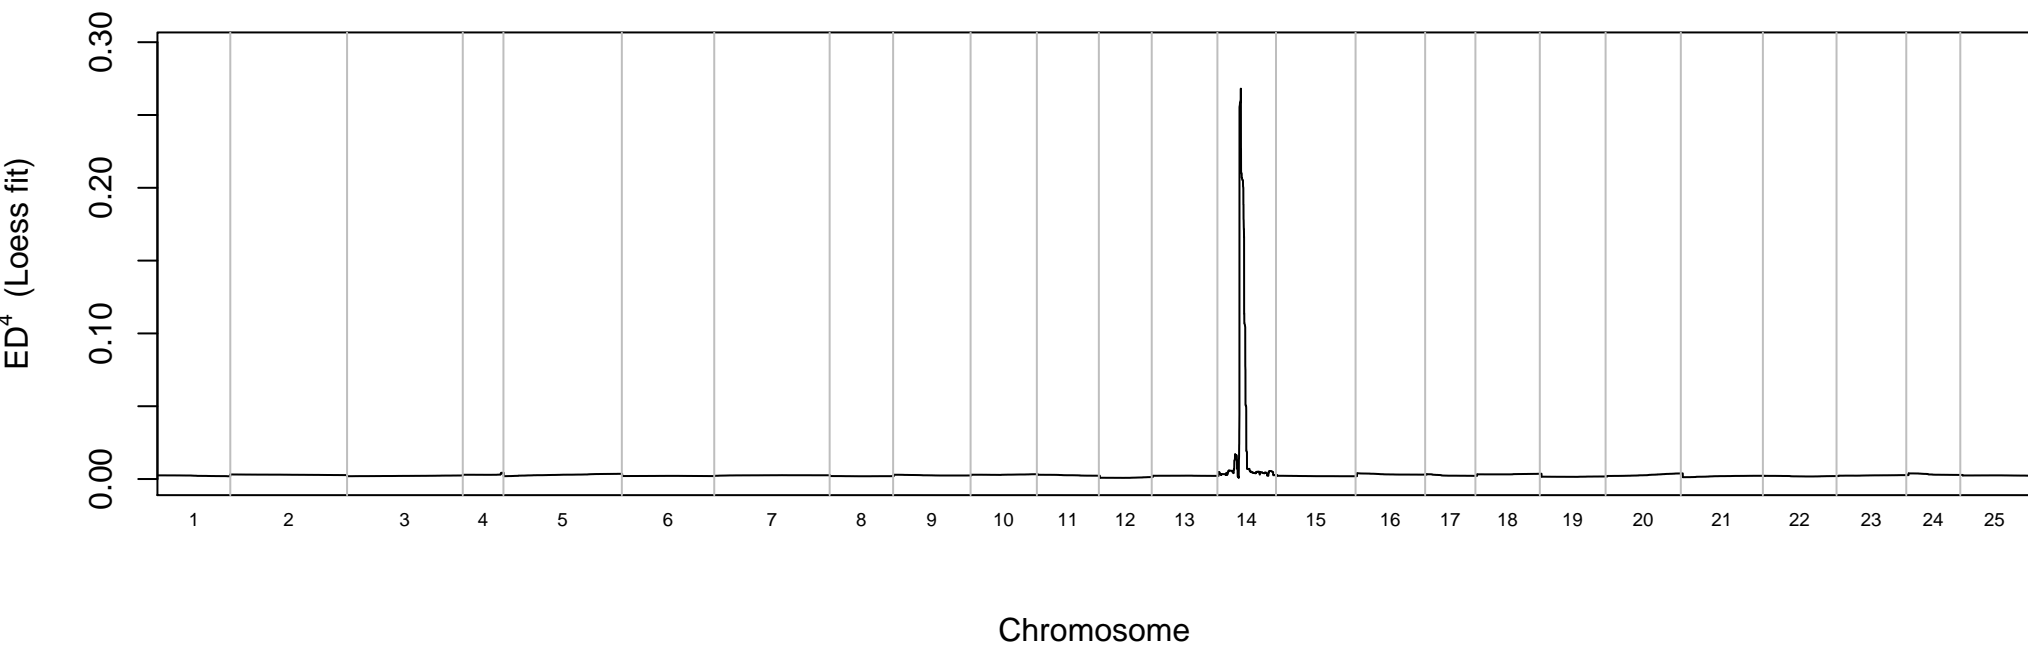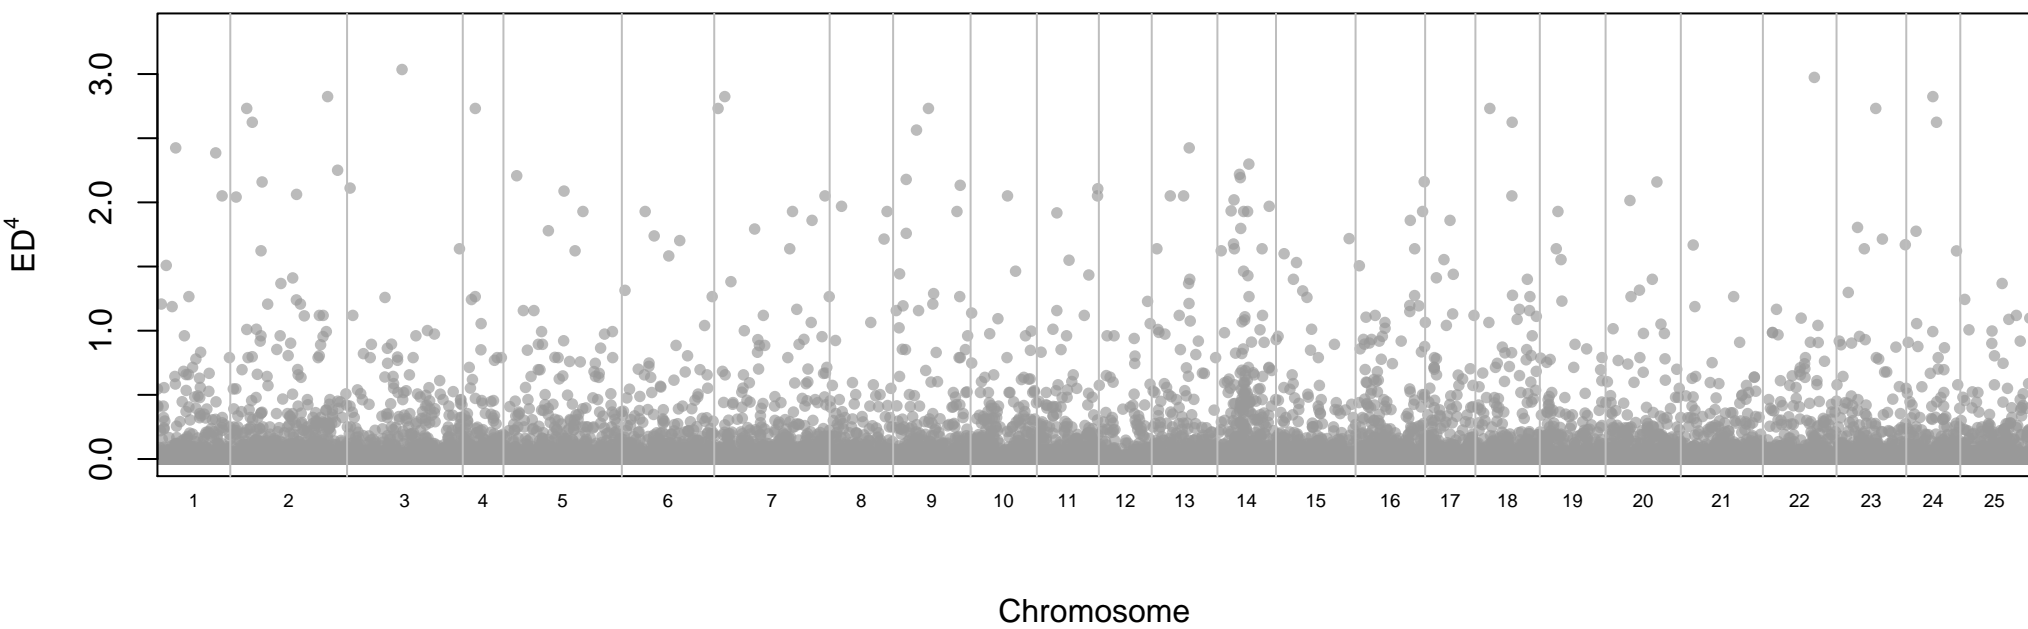

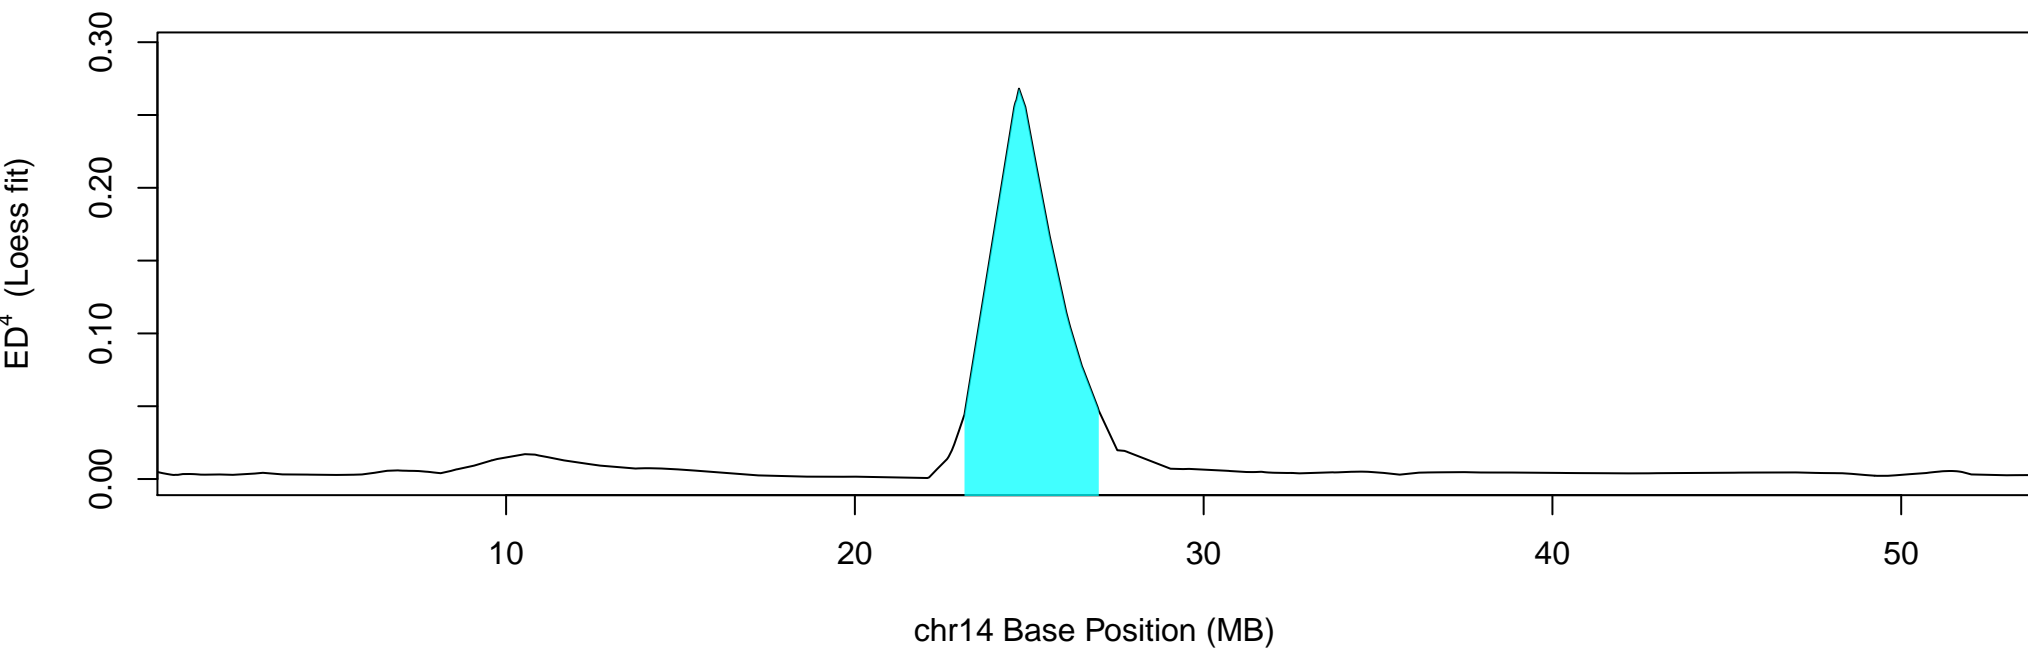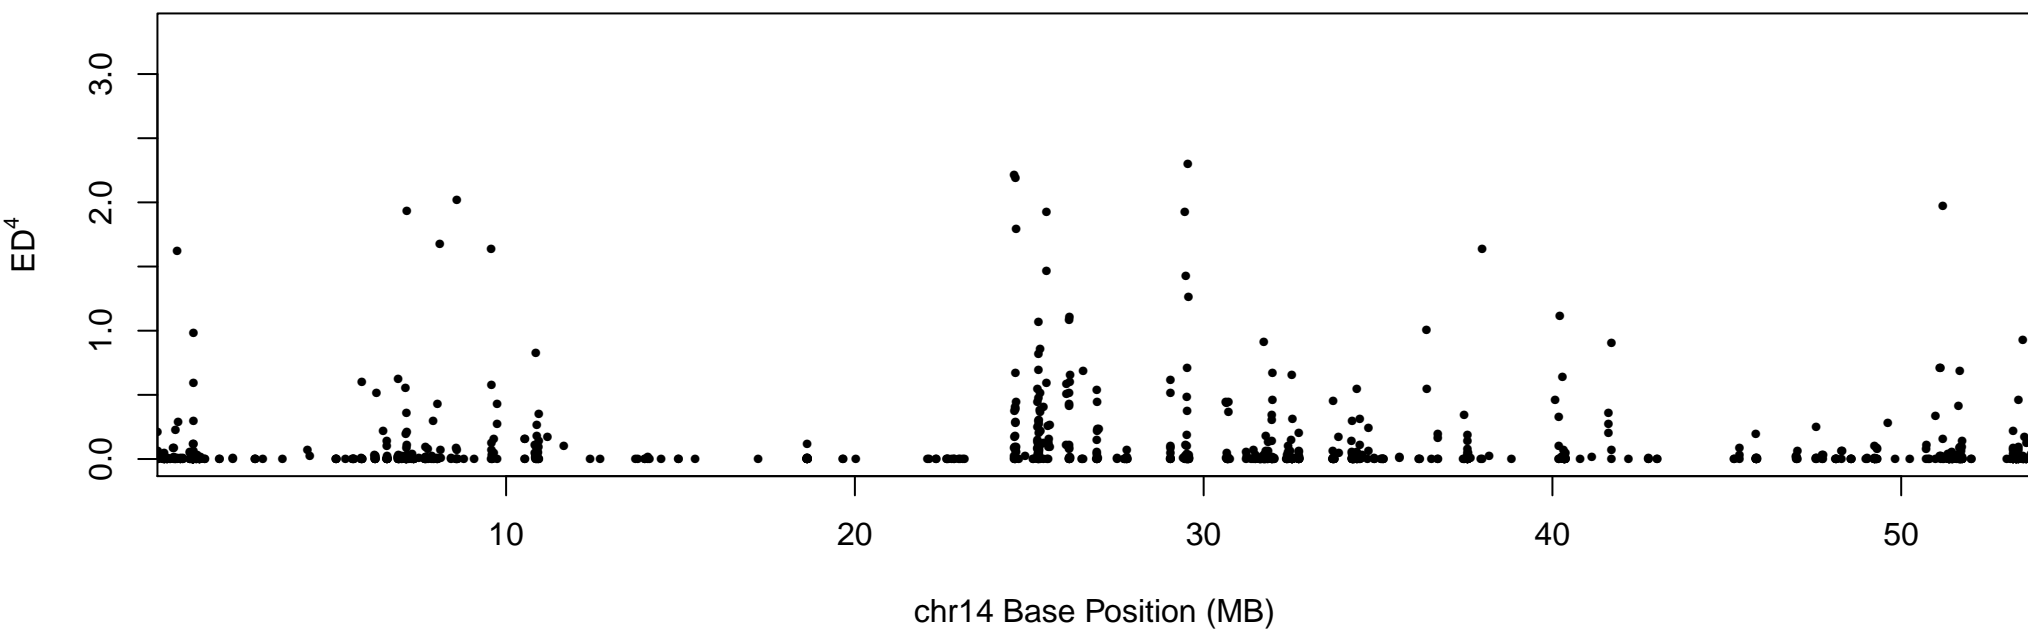

Supplement: Supplemental_File_1_Nkx2-5.zip [file Rplots.pdf › Supplemental File 1--Nkx2-5/snpmapresults/Rplots.pdf]

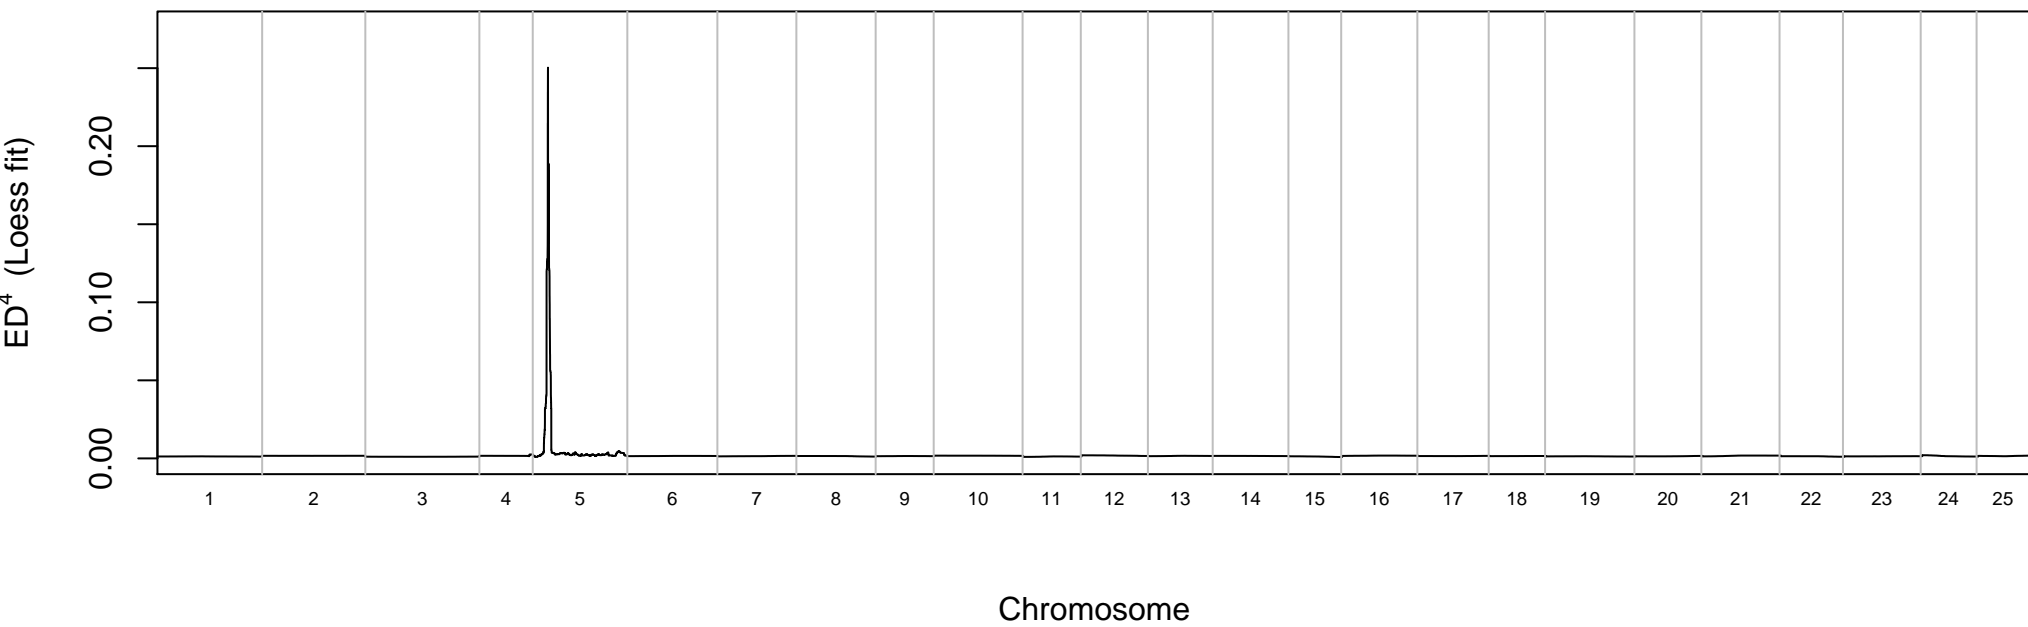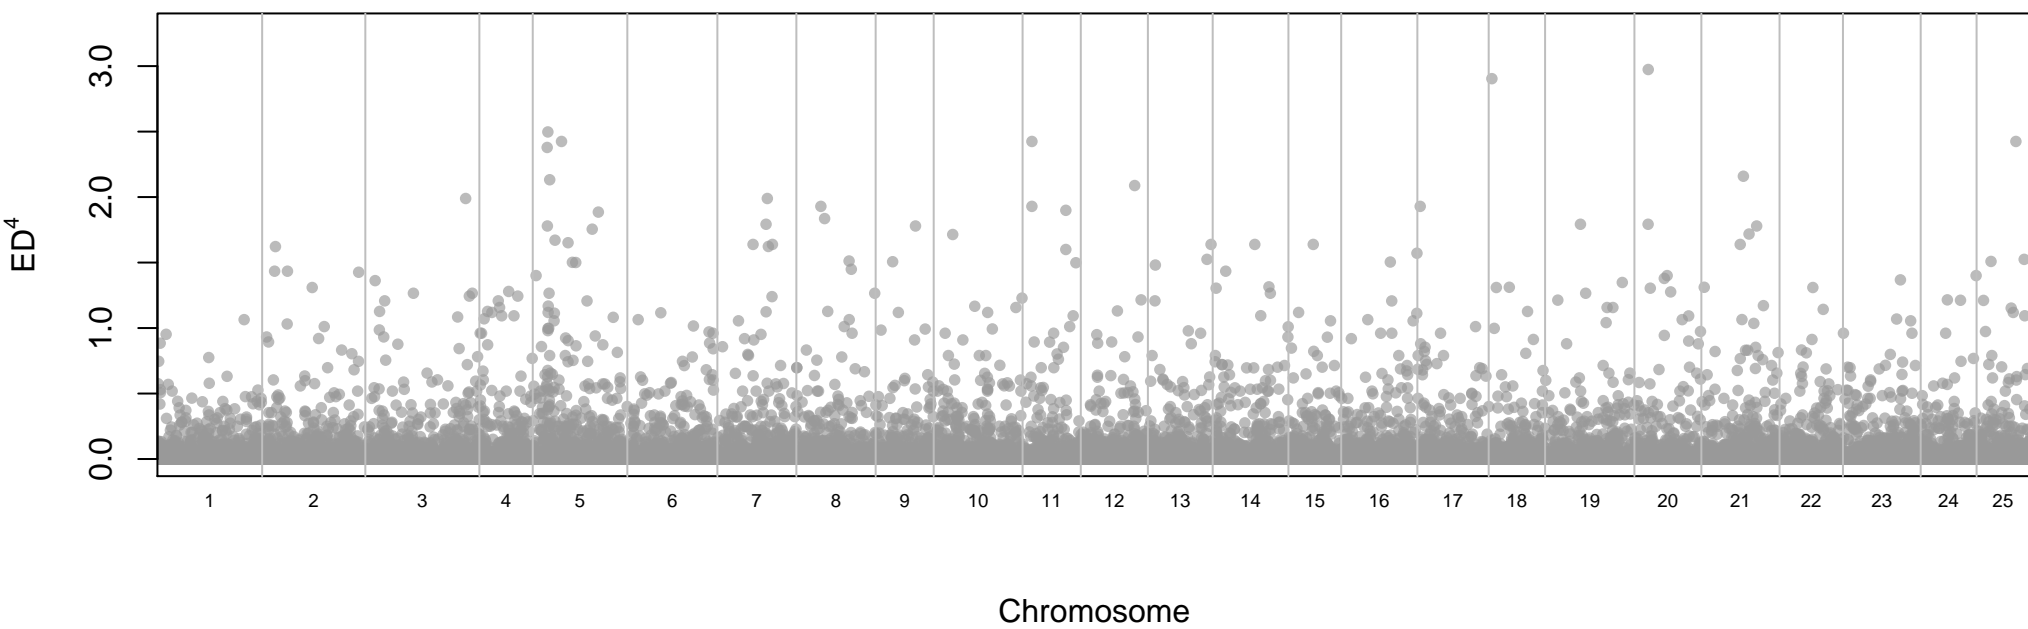

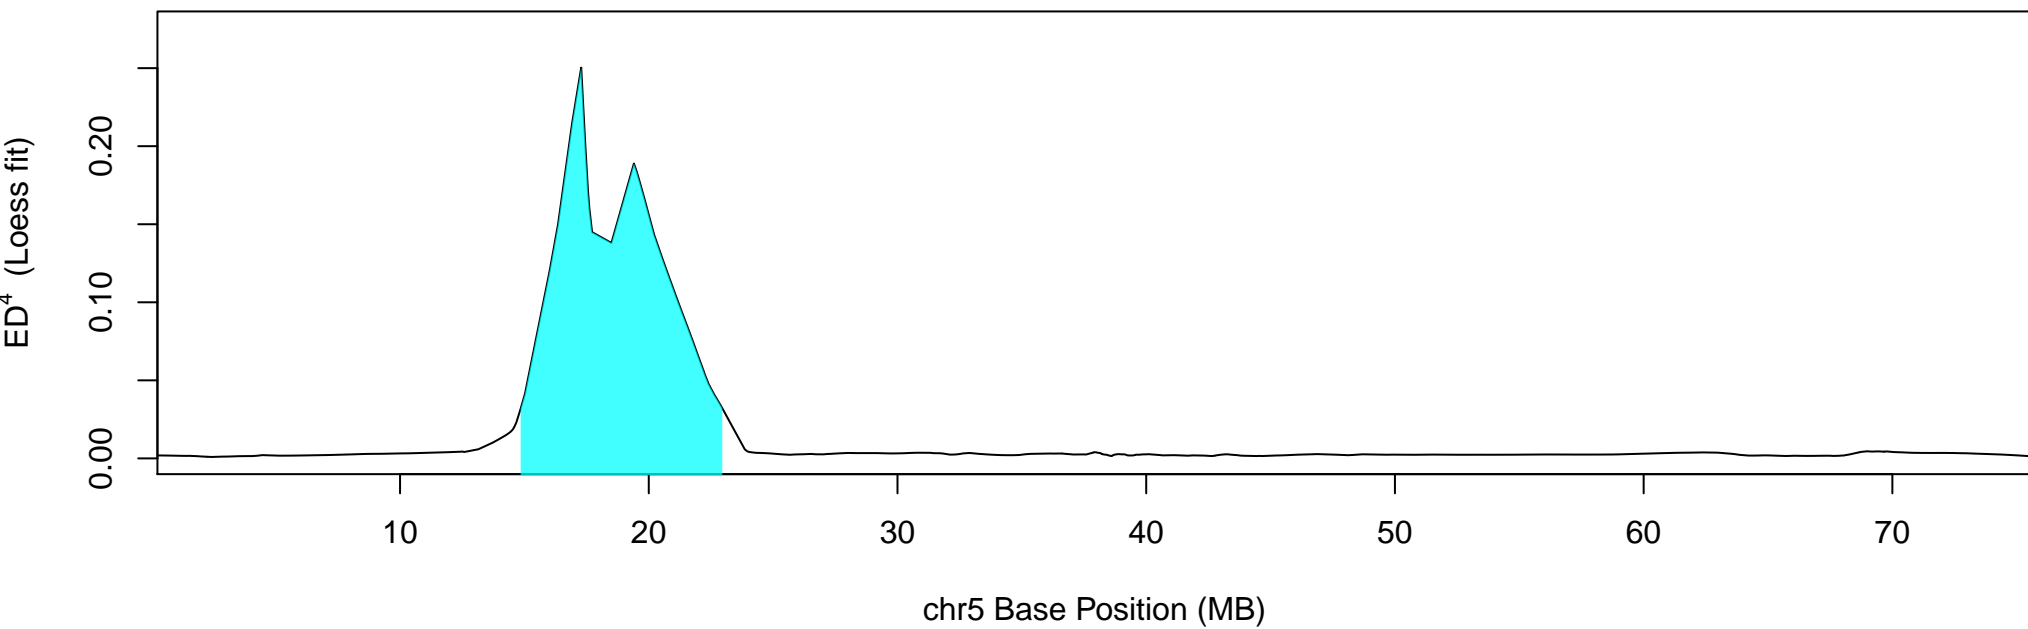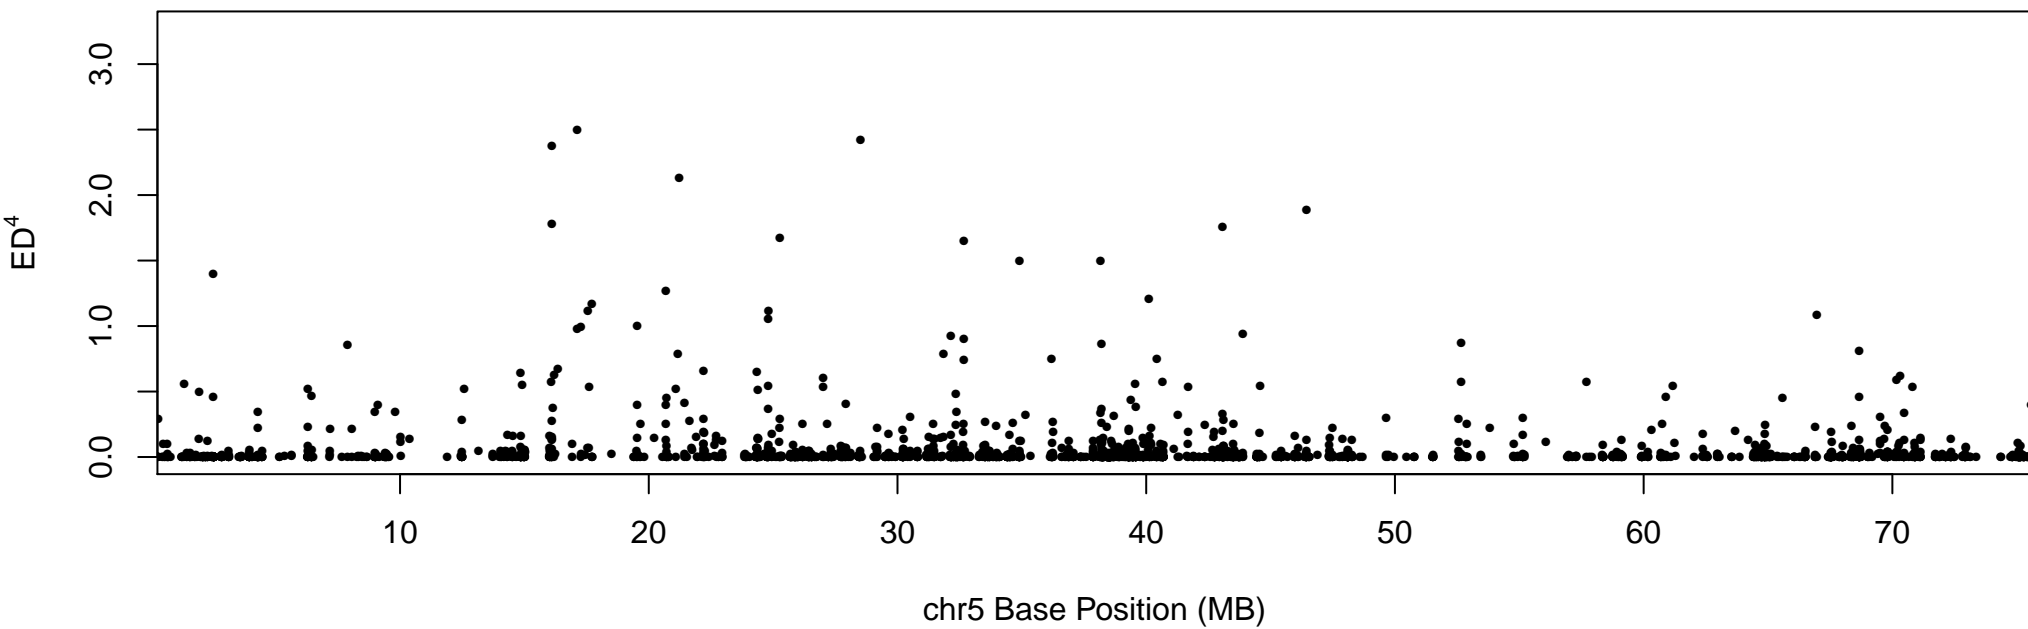

Supplement: Supplemental_File_2_Tbx1.zip [file Rplots.pdf › Supplemental File 2--Tbx1/snpmapresults/Rplots.pdf]

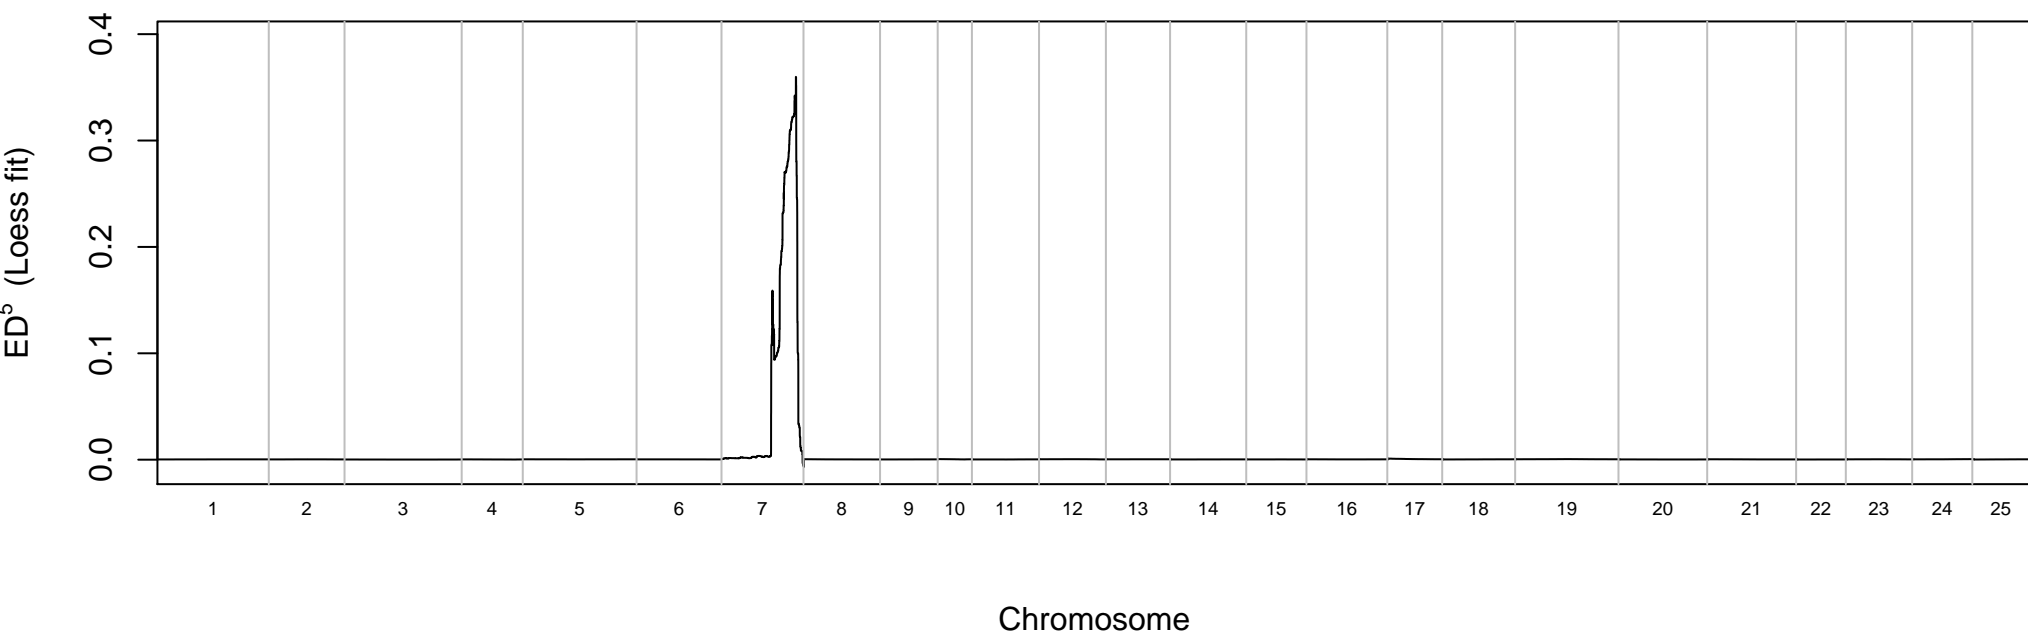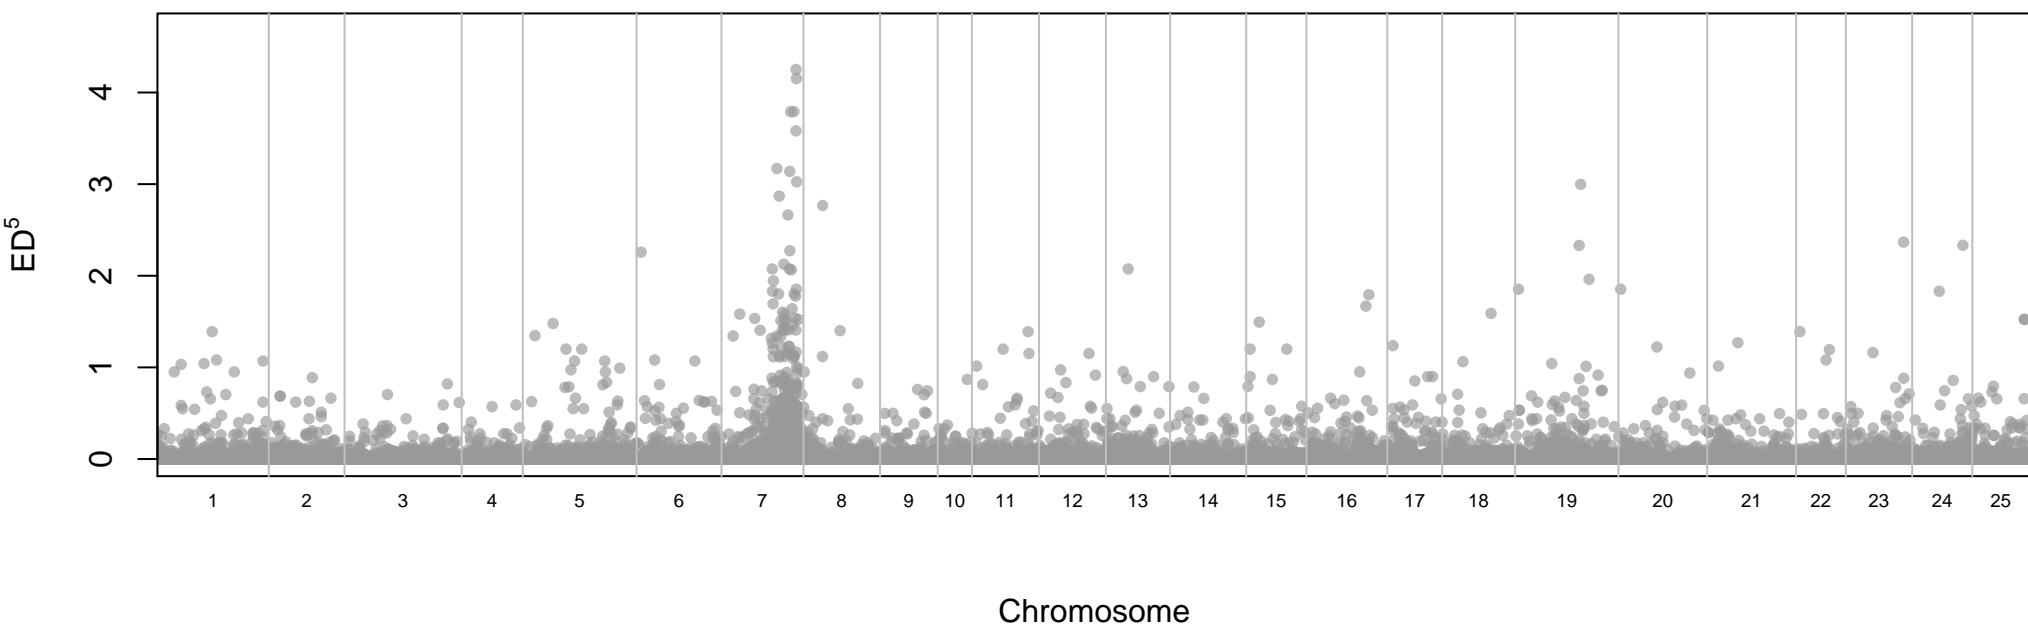

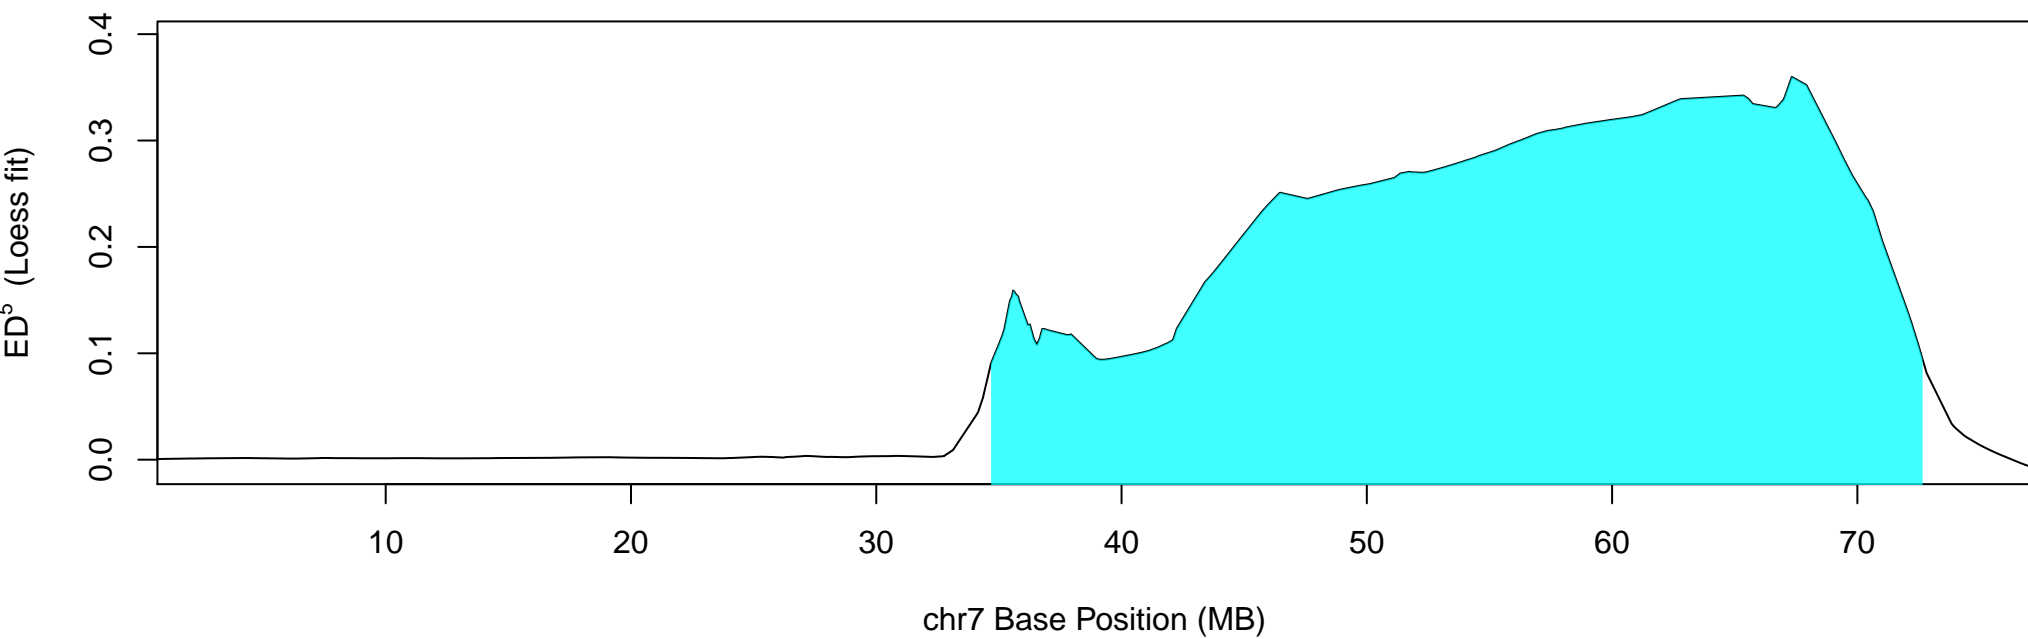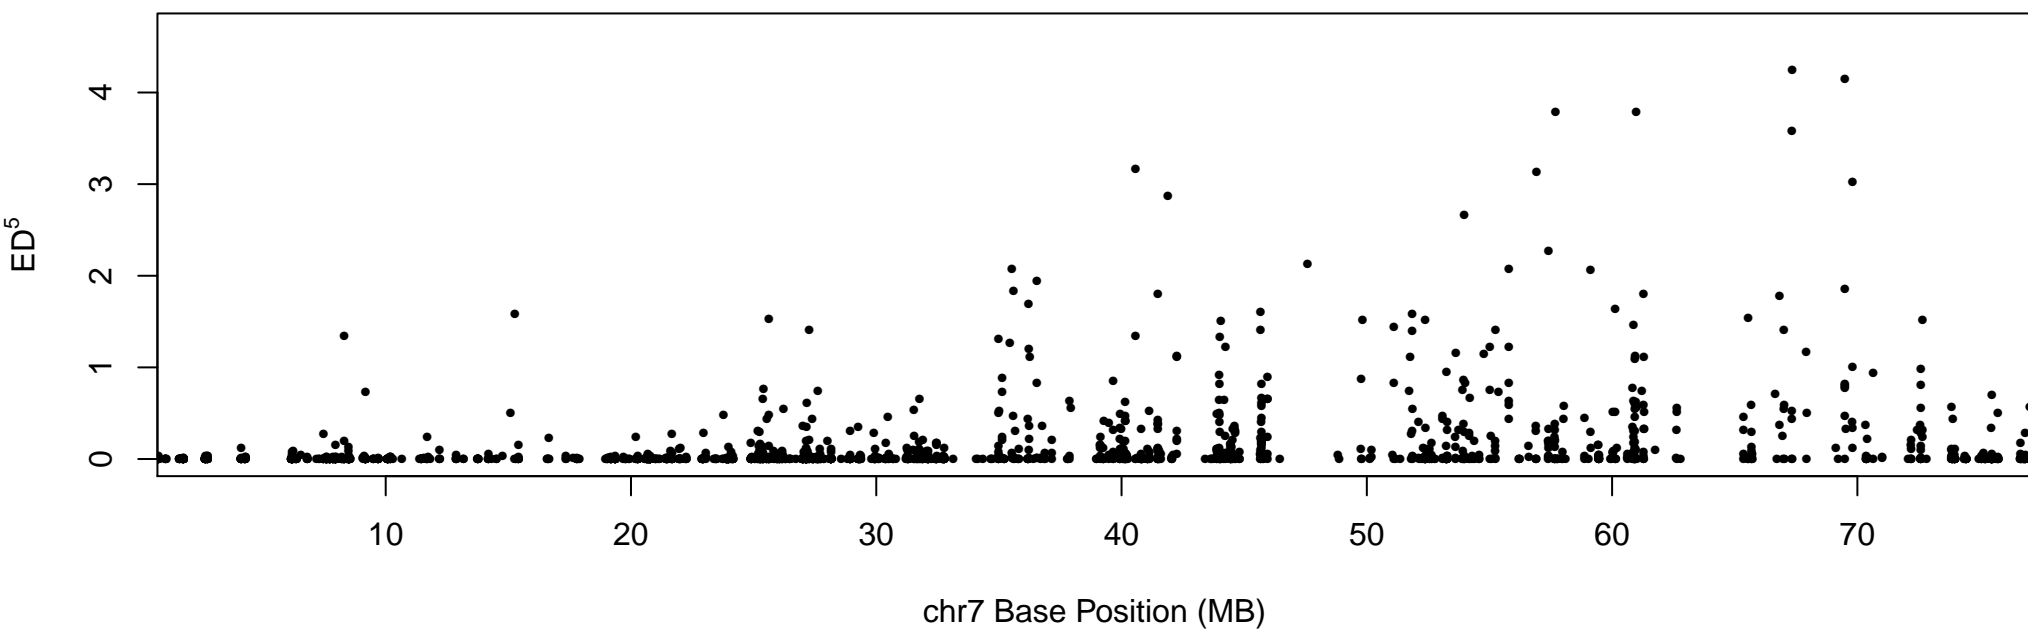

Supplement: Supplemental_File_3_zy13.zip [file Rplots.pdf › Supplemental File 3--zy13/zy13/snpmapresults/Rplots.pdf]

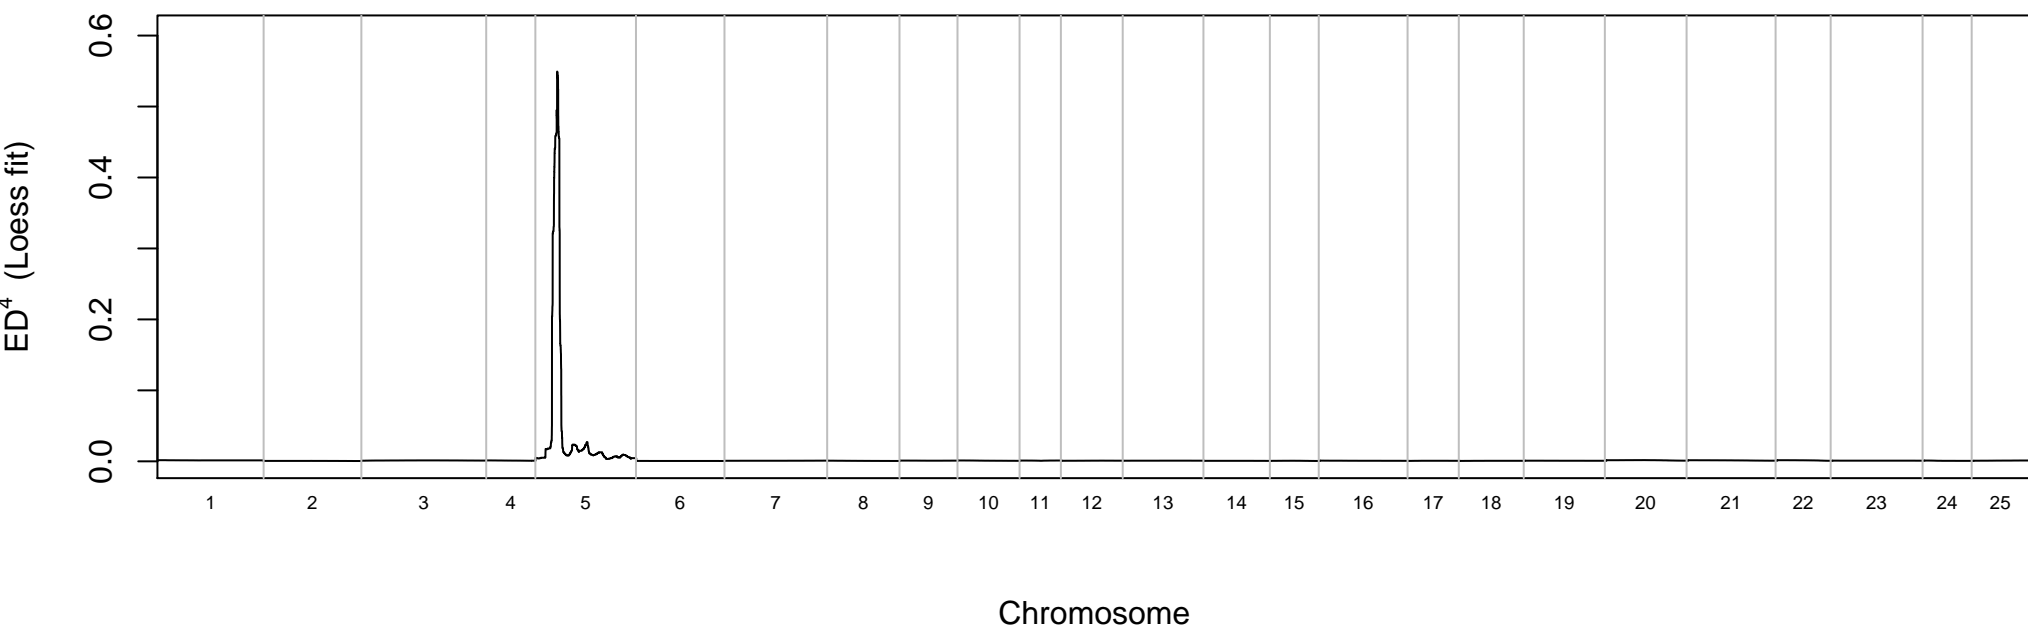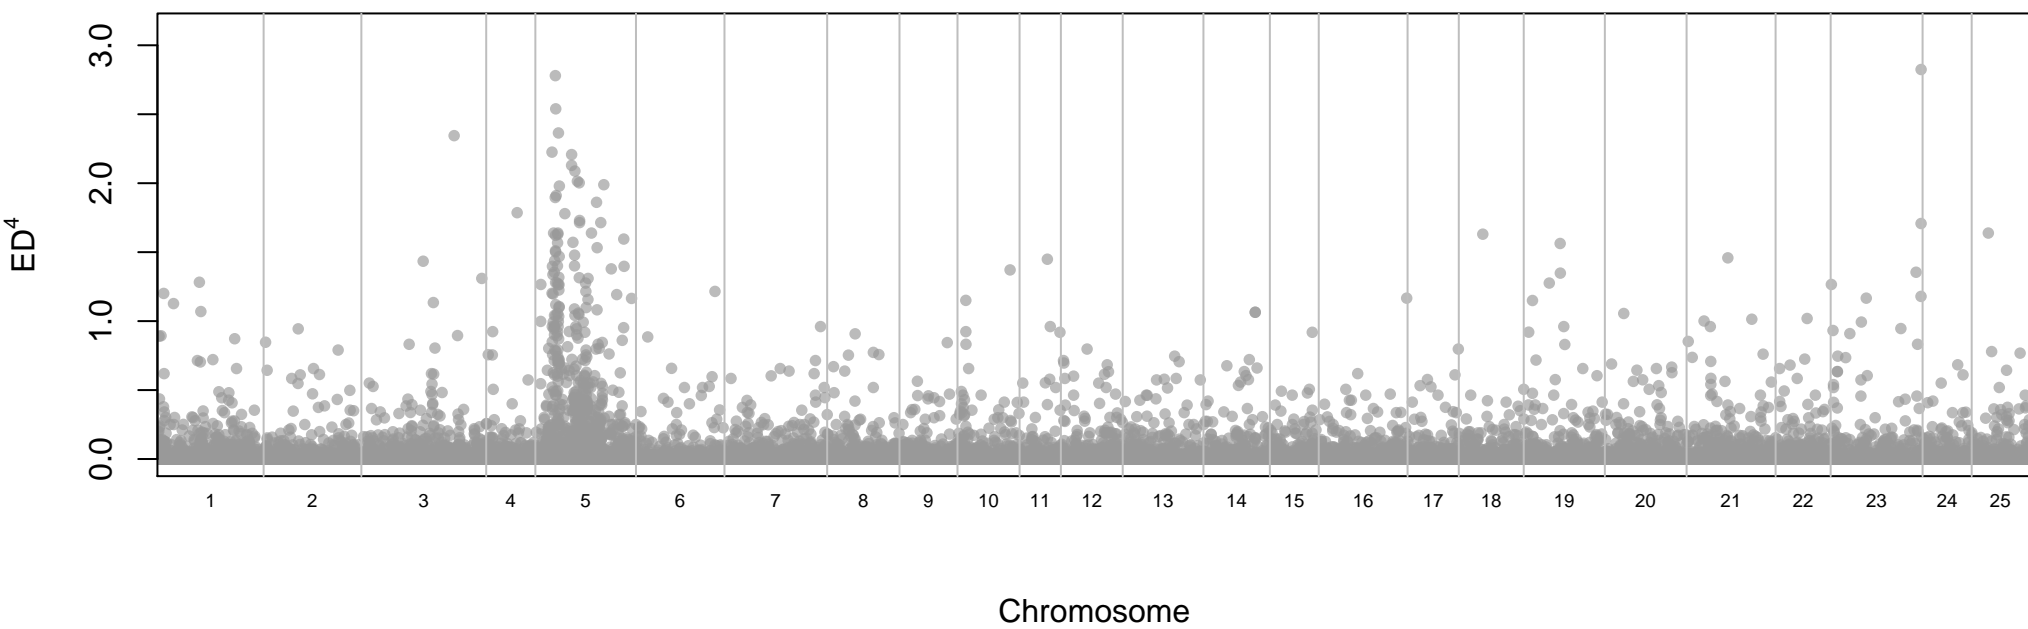

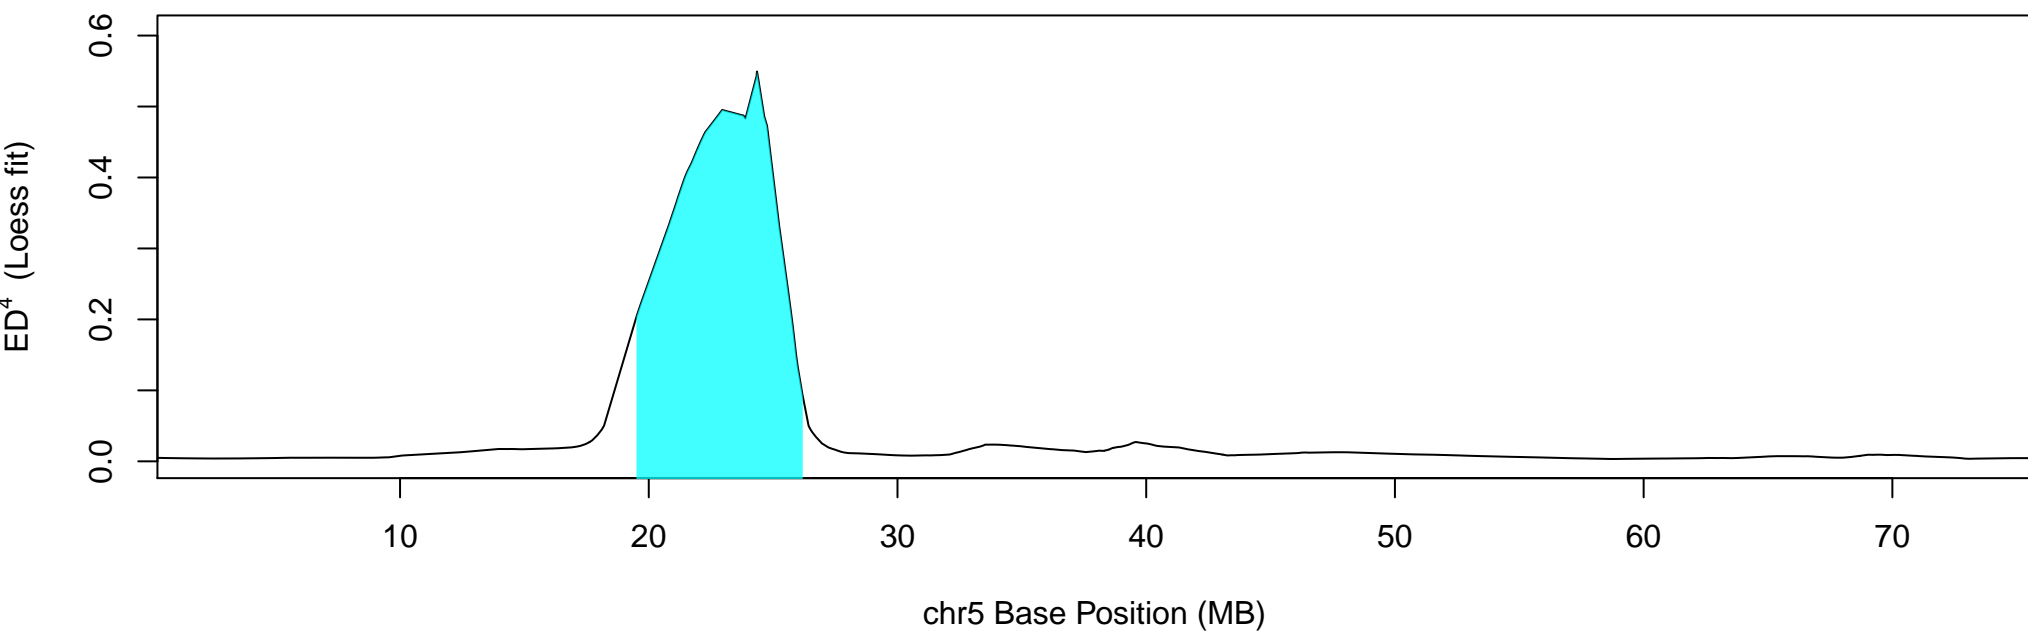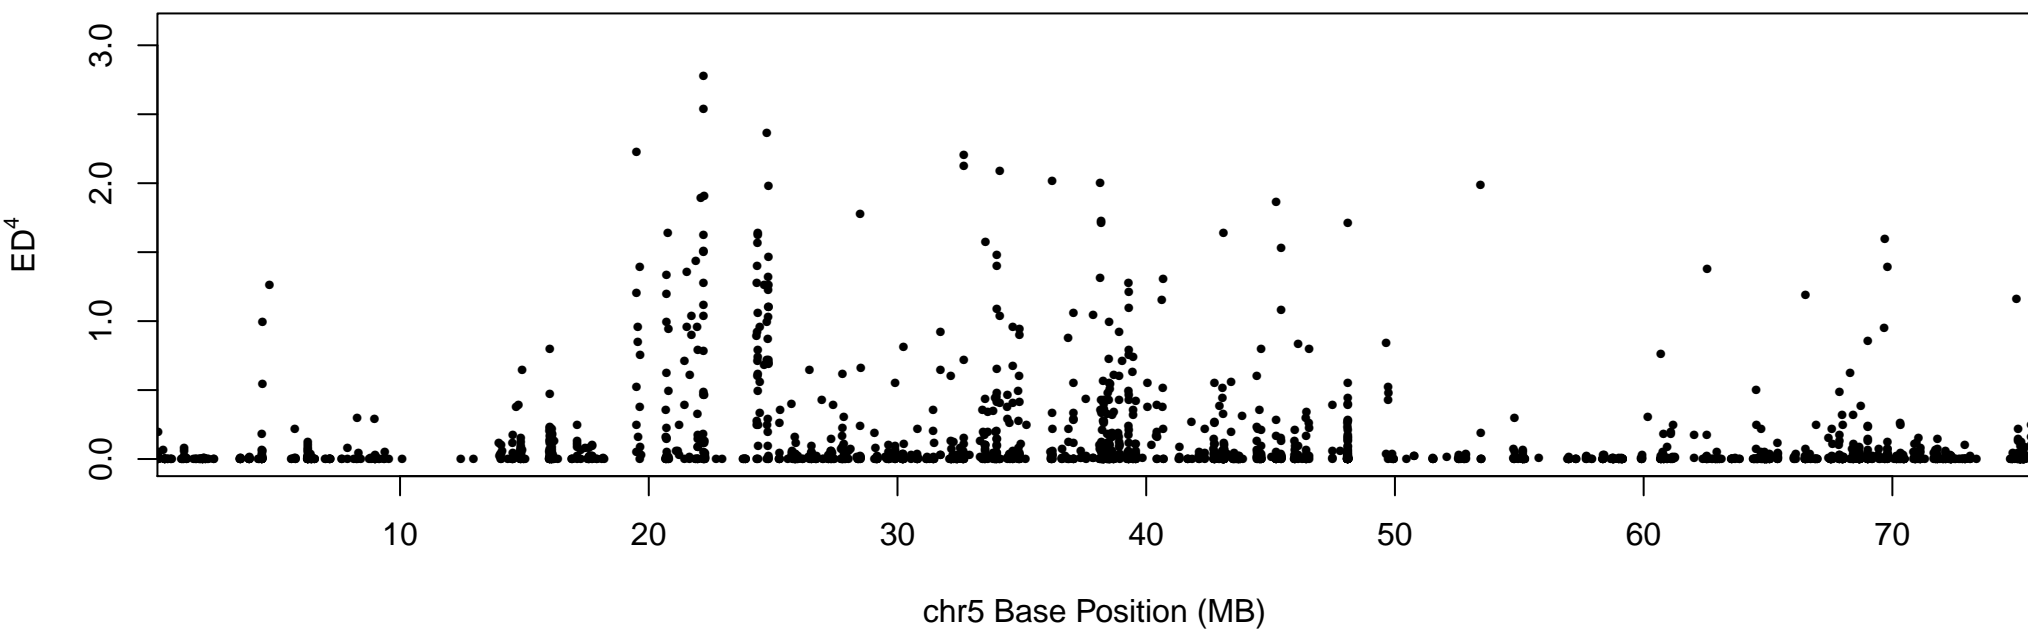

Supplement: Supplemental_File_4_zy14.zip [file Rplots.pdf › Supplemental File 4--zy14/zy14/snpmapresults/Rplots.pdf]
